# Supplementary material for: Involvement of information professionals in patient- and family-centered care initiatives: a scoping review
Source: PubMed Central journal article supplement (PMC6579588; doi:10.5195/jmla.2019.652), 2019-07-01
Supplement: jmla-107-314-s002.pdf [file jmla-107-314-s002.pdf]

## Involvement of information professionals in patient- and family-centered care initiatives: a scoping review

Antonio P. DeRosa, MS, MLIS, AHIP; Becky Baltich Nelson, MS, MLS; Diana Delgado, MLS, AHIP; Keith C. Mages, PhD, MLS, MSN, RN, AHIP; Lily Martin, MLS; Judy C. Stribling, MS, MLS, AHIP

### APPENDIX B

#### Code sheet for librarians supporting patient- and family-centered care (PFCC)

| Paper characteristics   |                                     |       |
|-------------------------|-------------------------------------|-------|
| P1. Study ID number     | #                                   | _____ |
| P2. Coder               | BLINDED FOR PEER REVIEW             | _____ |
| P3. Author(s)           | <i>Last, First et al.</i>           |       |
| P4. Date of publication | Year                                | _____ |
| P5. Location of study   | 0=USA                               | _____ |
|                         | 1=Other country _____               | _____ |
| Study design            |                                     |       |
| S1. Study design        | 0=Systematic review                 | _____ |
|                         | 1=Meta-analysis                     |       |
|                         | 2=Review                            |       |
|                         | 3=Case report                       |       |
|                         | 4=Clinical trial                    |       |
|                         | 5=Randomized controlled trial (RCT) |       |
|                         | 6=Observational study               |       |
|                         | 7=Exploratory/field study           |       |
|                         | 8=Conference abstract               |       |
| 9=Other _____           |                                     |       |

|                                                                                                                                                                                                    |                                                                                                                                                                                                                                                                                                      |       |
|----------------------------------------------------------------------------------------------------------------------------------------------------------------------------------------------------|------------------------------------------------------------------------------------------------------------------------------------------------------------------------------------------------------------------------------------------------------------------------------------------------------|-------|
| S2. Analysis methods                                                                                                                                                                               | 0=Quantitative<br>1=Qualitative<br>2=Mixed-methods<br>3=No analysis (e.g., review articles)                                                                                                                                                                                                          | _____ |
| <b>Study characteristics</b>                                                                                                                                                                       |                                                                                                                                                                                                                                                                                                      |       |
| C1. Population                                                                                                                                                                                     | 0=Patients<br>1=Family/caregivers<br>2=Public/community<br>3=Mixed<br>4=Other _____                                                                                                                                                                                                                  | _____ |
| C2. Type of patient- and family-centered care (PFCC) initiative (from the Institute of PFCC definition of PFCC: <a href="http://www.ipfcc.org/about/pfcc.html">www.ipfcc.org/about/pfcc.html</a> ) | 0=Quality/service improvement<br>1=Safety initiatives<br>2=Education of health professionals<br>3=Research<br>4=Facility design<br>5=Policy development<br>6=Information sharing/patient education<br>7=Participatory care/decision-making<br>8=Cultural and spiritual competencies<br>9=Other _____ | _____ |
| C3. If C2=9 ( <i>other</i> )                                                                                                                                                                       | Describe program/project discussed in study (we will synthesize into concepts/themes after data extraction phase)                                                                                                                                                                                    |       |

|                                                                                                                                                            |                                                                                                                                                                                                                                                                     |
|------------------------------------------------------------------------------------------------------------------------------------------------------------|---------------------------------------------------------------------------------------------------------------------------------------------------------------------------------------------------------------------------------------------------------------------|
| <p>C4. Type of institution (where PFCC study took place)</p>                                                                                               | <p>0=Hospital _____<br/>1=University/college<br/>2=Nonprofit organization<br/>3=Public library<br/>4=Federal institution<br/>5=Company/business<br/>6=Other _____</p>                                                                                               |
| <p>C5. Information professional role/intervention</p>                                                                                                      | <p>Describe the role/intervention that the information professional played in supporting the PFCC program or project (we will synthesize into concepts/themes after data extraction phase)</p>                                                                      |
| <p>C6. How information professional or library became involved</p>                                                                                         | <p>Describe how the information professional or library became involved in supporting the PFCC program or project (we will synthesize into concepts/themes after data extraction phase)</p>                                                                         |
| <p>C7. Library as place or librarian as professional?</p>                                                                                                  | <p>0=Library or information/resource center _____<br/>1=Librarian or information professional (various titles)<br/>2=Both library and librarian<br/>3=Other _____</p>                                                                                               |
| <p>C8. PFCC outcomes (from the Institute of PFCC definition of PFCC: <a href="http://www.ipfcc.org/about/pfcc.html">www.ipfcc.org/about/pfcc.html</a>)</p> | <p>0=Better health outcomes _____<br/>1=Improved patient/family experience<br/>2=Better clinician/staff satisfaction<br/>3=Wiser allocation of resources<br/>4=Other _____</p>                                                                                      |
| <p>C9. If C8=4 (<i>other</i>)</p>                                                                                                                          | <p>Describe any/all outcomes discussed in the study that do not appear in C8; e.g., empowerment, health literacy, reduced cost/time, other collaborative and participatory outcomes, etc. (we will synthesize into concepts/themes after data extraction phase)</p> |
